# Supplementary material for: Dysregulation of Glycerophosphocholines in the Cutaneous Lesion Caused by Leishmania major in Experimental Murine Models
Source: MDPI journal article supplement (doi:10.3390/pathogens10050593), 2021-05-13

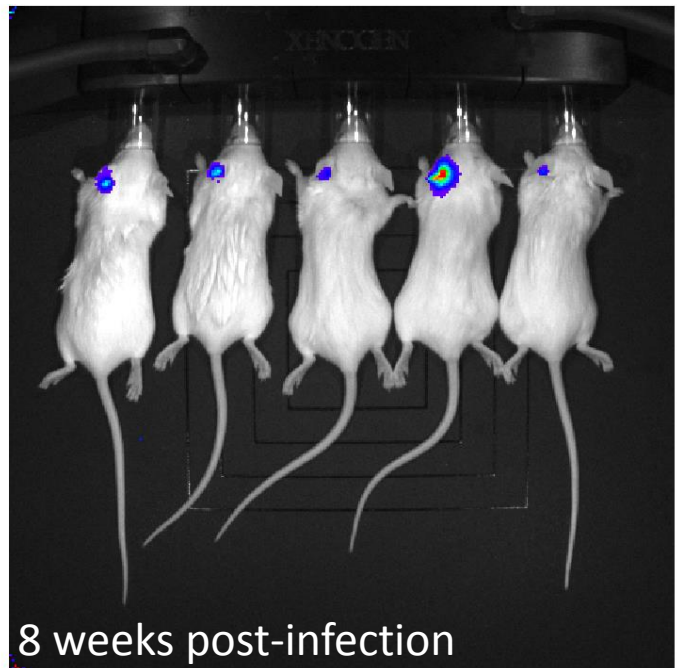

| Mouse number | Luminescence counts |
|--------------|---------------------|
| mouse 1      | 2.18E+04            |
| mouse 2      | 1.84E+04            |
| mouse 3      | 1.02E+04            |
| mouse 4      | 7.95E+04            |
| mouse 5      | 7.35E+03            |

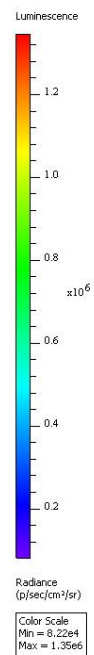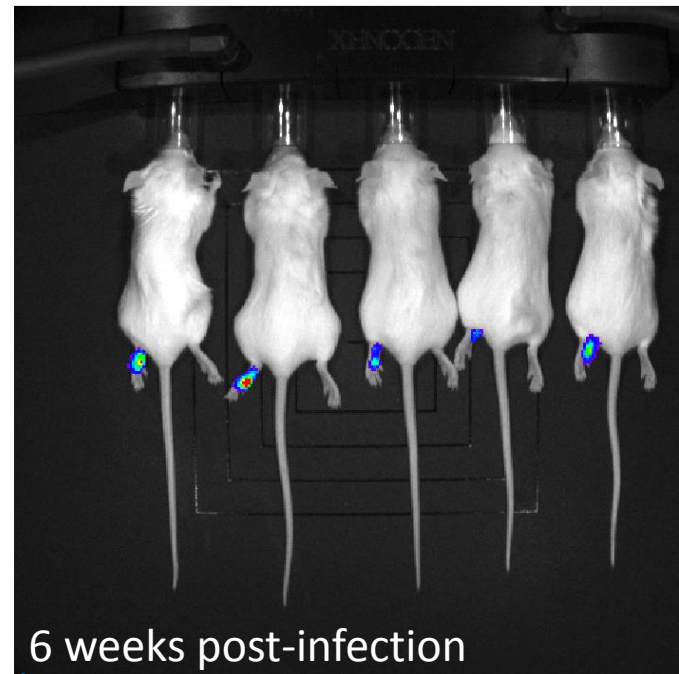

| Mouse number | Luminescence counts |
|--------------|---------------------|
| mouse 1      | 5.11E+05            |
| mouse 2      | 6.46E+05            |
| mouse 3      | 2.41E+05            |
| mouse 4      | 1.44E+05            |
| mouse 5      | 4.13E+05            |

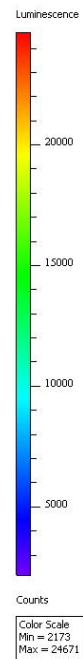

Supplement: s1 [file s1]
